# Supplementary material for: Postpartum Weight Change in Relation to Pre-Pregnancy Weight and Gestational Weight Gain in Women in Low-Income Setting: Data from the KITE Cohort in the Northern Part of Ethiopia
Source: MDPI journal article supplement (doi:10.3390/nu14010131), 2021-12-28
Supplement: s1 [file s1]

**Supplementary Table S1.** Summary of the nutritional characteristics of the women who successfully completed the study and included in the final analyses.

| Nutritional characteristics                   | Postpartum weight change in kg |                    |                              |                        |                        |                     |
|-----------------------------------------------|--------------------------------|--------------------|------------------------------|------------------------|------------------------|---------------------|
|                                               | Total<br>n=585                 | Lost ≥1.0<br>n=106 | Lost or gained <1.0<br>n=296 | Gained 1.0–1.9<br>n=87 | Gained 2.0–2.9<br>n=66 | Gained ≥3.0<br>n=30 |
| Maternal height in cm, mean                   | 157.3 (0.1)                    | 158.9 (0.1)        | 1567.6 (0.1)                 | 158.2 (0.1)            | 156.8 (0.1)            | 156.2 (0.1)         |
| Pre-pregnancy weight in kg, mean              | 49.0 (6.9)                     | 49.5 (6.4)         | 47.3 (6.4)                   | 51.6 (6.8)             | 51.9 (7.6)             | 49.6 (7.5)          |
| Weight at inclusion in kg, mean               | 51.4 (7.1)                     | 51.6 (6.4)         | 49.6 (6.5)                   | 54.6 (6.9)             | 54.9 (7.7)             | 52.8 (7.3)          |
| Pre-pregnancy BMI in kg/m <sup>2</sup> , mean | 19.7 (2.0)                     | 19.6 (1.8)         | 19.2 (1.8)                   | 20.6 (2.1)             | 21.1 (2.0)             | 20.2 (2.1)          |
| BMI at inclusion in kg/m <sup>2</sup> , mean  | 20.7 (2.1)                     | 20.4 (1.8)         | 20.1 (1.9)                   | 21.8 (2.1)             | 22.3 (2.1)             | 21.6 (2.1)          |
| MUAC at inclusion in cm, mean                 | 22.6 (2.0)                     | 22.5 (1.7)         | 22.1 (1.8)                   | 23.4 (2.1)             | 23.8 (2.0)             | 23.1 (2.1)          |
| Hemoglobin in g/dL, mean (n=550)              | 12.0 (1.6)                     | 11.3 (1.4)         | 11.6 (1.6)                   | 12.8 (1.4)             | 13.1 (1.3)             | 13.0 (1.5)          |
| MUAC at 32 to 36 wks in cm, mean              | 22.8 (2.0)                     | 22.7 (1.8)         | 22.3 (1.8)                   | 23.6 (2.1)             | 24.0 (2.0)             | 23.3 (2.1)          |
| Weight at 32 to 36 wks in kg, mean            | 59.7 (7.9)                     | 58.1 (6.8)         | 57.3 (7.1)                   | 64.2 (6.9)             | 65.3 (8.0)             | 64.2 (7.6)          |
| Gestational weight gain in kg, mean           | 10.8 (2.3)                     | 8.6 (1.5)          | 10.1 (1.6)                   | 12.6 (1.2)             | 13.4 (1.2)             | 14.6 (0.8)          |
| Postpartum MUAC in cm, mean                   | 23.1 (2.5)                     | 22.0 (2.0)         | 22.3 (2.1)                   | 24.6 (2.4)             | 25.6 (2.3)             | 25.2 (2.4)          |
| Postpartum weight in kg, mean                 | 49.4 (7.2)                     | 47.8 (6.3)         | 47.3 (6.4)                   | 53.1 (6.8)             | 54.3 (7.6)             | 53.2 (7.4)          |
| Postpartum BMI in kg/m <sup>2</sup> , mean    | 19.9 (2.2)                     | 18.9 (1.8)         | 19.2 (1.8)                   | 21.2 (2.1)             | 22.0 (2.0)             | 21.8 (2.1)          |
| Postpartum weight change in kg, mean          | 0.42 (1.5)                     | -1.7 (0.6)         | 0.08 (0.5)                   | 1.5 (0.3)              | 2.4 (0.3)              | 3.7 (0.6)           |
| Pre-pregnancy BMI, n (%)                      |                                |                    |                              |                        |                        |                     |
| Underweight                                   | 213 (36.4)                     | 37 (17.4)          | 143 (67.1)                   | 18 (8.5)               | 8 (3.8)                | 7 (3.3)             |
| Normal weight                                 | 372 (63.6)                     | 69 (18.6)          | 153 (41.1)                   | 69 (18.6)              | 58 (15.6)              | 23 (6.2)            |
| Gestational weight gain, n (%)                |                                |                    |                              |                        |                        |                     |
| Inadequate weight gain                        | 364 (62.2)                     | 103 (28.3)         | 240 (65.9)                   | 15 (4.1)               | 5 (1.4)                | 1 (0.3)             |
| Adequate weight gain                          | 221 (37.8)                     | 3 (1.4)            | 56 (25.3)                    | 72 (32.6)              | 61 (27.6)              | 29 (13.1)           |
| Postpartum BMI, n (%)                         |                                |                    |                              |                        |                        |                     |
| Underweight                                   | 194 (33.2)                     | 55 (28.4)          | 119 (61.3)                   | 14 (7.2)               | 4 (2.1)                | 2 (1.0)             |
| Normal weight                                 | 391 (66.8)                     | 51 (13.0)          | 177 (45.3)                   | 73 (18.7)              | 62 (15.9)              | 28 (7.2)            |
